# Supplementary material for: Airborne observation with a low-cost hyperspectral instrument: Retrieval of NO 2 VCD and the satellite sub-grid variability over industrial point sources
Source: Copernicus journal article supplement (doi:10.5194/egusphere-2023-1747), 2023-08-22
Supplement: Supplementary file 1 [file egusphere-2023-1747-supplement.pdf]

1 **Supplementary Tables**

2

3 **Table S1.** Column integrated AOD and SSA values used for the LUT construction for each research flight, observed  
4 from the nearest AERONET site.

| Variables<br>(Acronym)     | 17 OCT 2020<br>(Chungnam)     | 3 NOV 2020<br>(Jaechon)              | 5 NOV 2020<br>(Pohang)               | 24 NOV 2022<br>(Chungnam)     | 25 NOV 2022<br>(Chungnam)     |
|----------------------------|-------------------------------|--------------------------------------|--------------------------------------|-------------------------------|-------------------------------|
| AOD (440 nm)               | 0.18                          | 0.09                                 | 0.21                                 | 0.35                          | 0.28                          |
| SSA (440 nm)               | 0.925                         | 0.96                                 | 0.96                                 | 0.937                         | 0.944                         |
| AERONET site<br>(Lat, Lon) | Anmyon<br>(36.539N, 126.330E) | Gangneung_WNU<br>(37.771N, 128.867E) | Gangneung_WNU<br>(37.771N, 128.867E) | Anmyon<br>(36.539N, 126.330E) | Anmyon<br>(36.539N, 126.330E) |

5

6

7 **Table S2.** Reference conditions for the sensitivity test per research flights

| <b>Variables<br/>(Acronym)</b> | <b>17 OCT 2020<br/>(Chungnam)</b> | <b>3 NOV 2020<br/>(Jaechon)</b> | <b>5 NOV 2020<br/>(Pohang)</b> | <b>24 NOV 2022<br/>(Chungnam)</b> | <b>25 NOV 2022<br/>(Chungnam)</b> |
|--------------------------------|-----------------------------------|---------------------------------|--------------------------------|-----------------------------------|-----------------------------------|
| <b>NO<sub>2</sub> VCD</b>      | 1.00 DU                           | 1.00 DU                         | 1.00 DU                        | 1.00 DU                           | 1.00 DU                           |
| <b>PBLH</b>                    | 1.0 km                            | 1.0 km                          | 1.0 km                         | 1.0 km                            | 1.0 km                            |
| <b>ALB</b>                     | 0.15                              | 0.15                            | 0.15                           | 0.15                              | 0.15                              |
| <b>SZA</b>                     | 48 °                              | 54 °                            | 54 °                           | 57 °                              | 57 °                              |
| <b>ALT</b>                     | 1,600 m                           | 1,600 m                         | 2,900 m                        | 1,500 m                           | 1,700 m                           |
| <b>VZA</b>                     | 0 °                               | 0 °                             | 0 °                            | 0 °                               | 0 °                               |
| <b>RAA</b>                     | 0 °                               | 0 °                             | 0 °                            | 0 °                               | 0 °                               |

10 **Table S3.** Details of research flight for the airborne HIS observation. (See Fig. 4 for the acronyms of industrial  
 11 NO<sub>2</sub> point sources)

| Date             | Target domain | Potential emission point sources | Airplane type    |
|------------------|---------------|----------------------------------|------------------|
| 17 October 2020  | Chungnam      | PP, PC, SY                       | Cessna 208       |
| 3 November 2020  | Jaechon       | CK                               | Cessna 208       |
| 5 November 2020  | Pohang        | SY                               | Cessna 208       |
| 24 November 2022 | Chungnam      | PP, PC, SY                       | Beechcraft 1900D |
| 25 November 2022 | Chungnam      | PP, PC, SY                       | Beechcraft 1900D |

14 **Supplementary Figures**

15

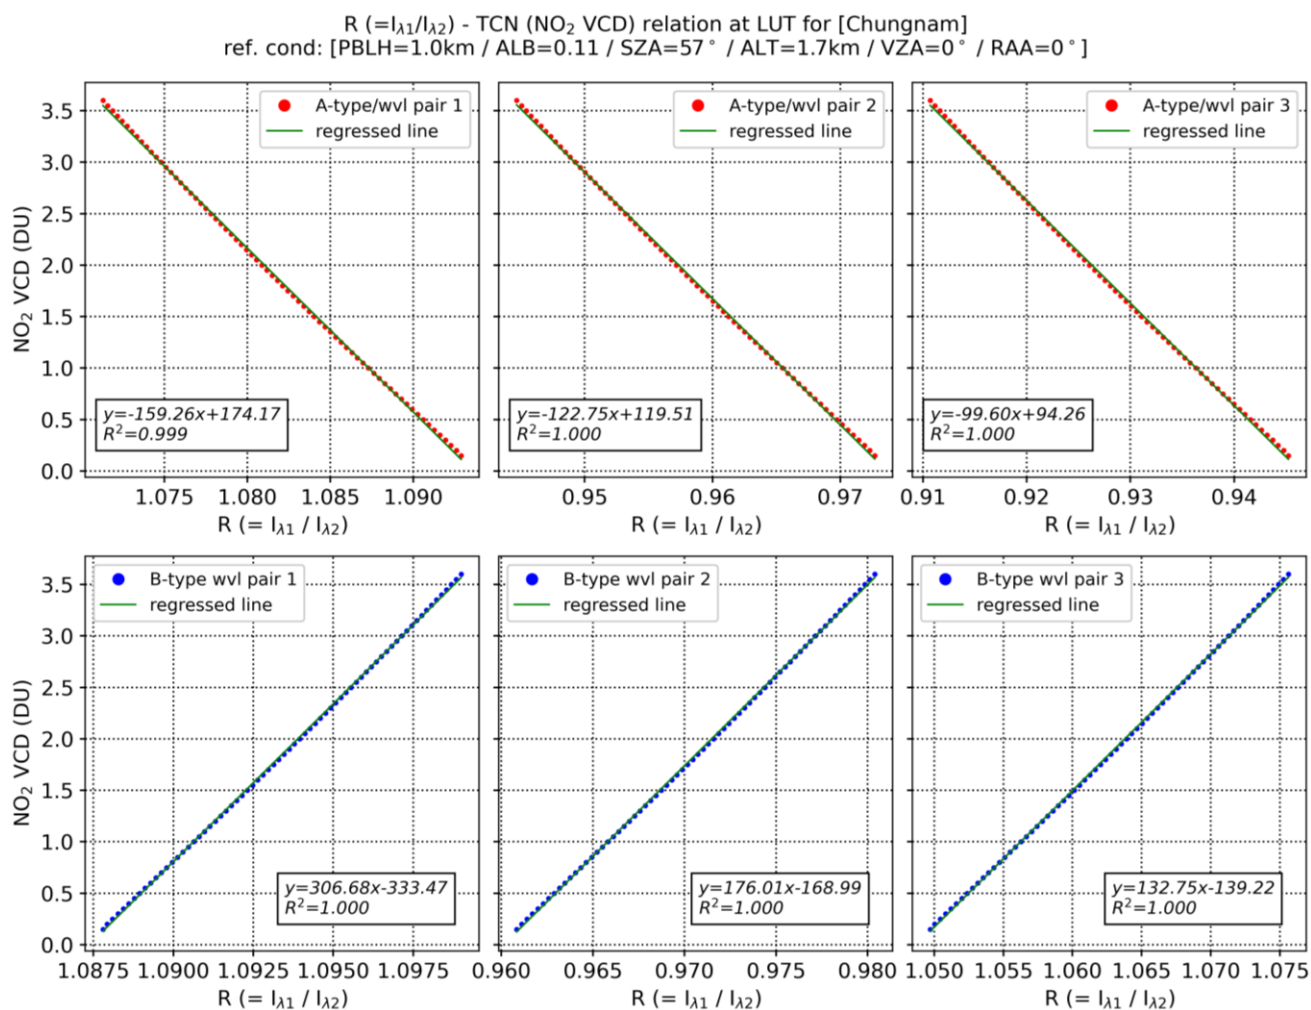

16

17 **Figure S1.** Relationship between R values of the wavelength pairs and the  $\text{NO}_2$  VCDs based on forward RTM  
18 simulations.

19

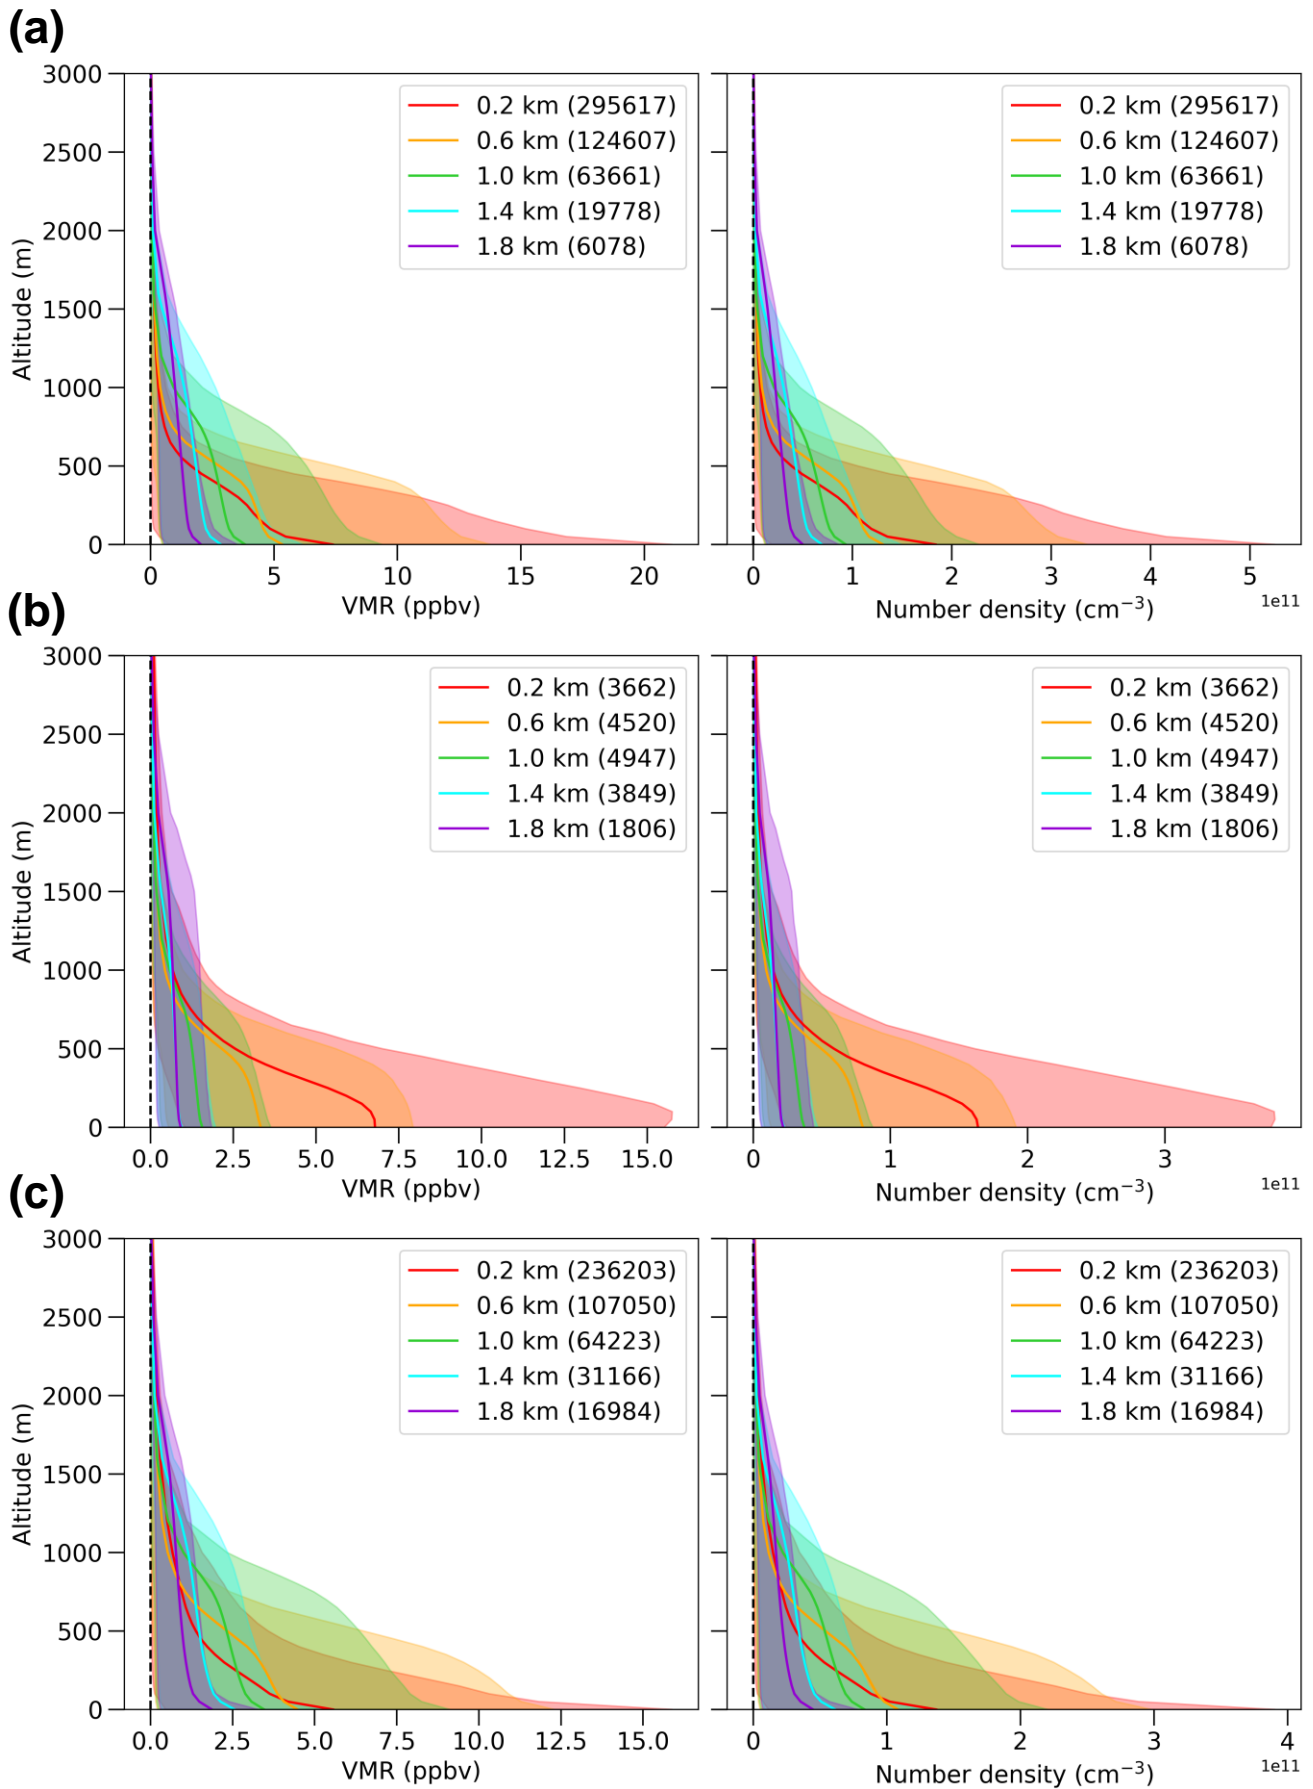

**Figure S2.** CMAQ-driven vertical profiles of NO<sub>2</sub> volume mixing ratio (left) and number densities (right) at (a) Chungnam, (b) Jaechon, and (c) Pohang domain according to the PBLH. The shaded area shows the 10<sup>th</sup> and 90<sup>th</sup> percentiles of NO<sub>2</sub> concentrations at each altitude per PBLH conditions, and the numbers in parentheses are the corresponding vertical profiles accounted for the analysis.

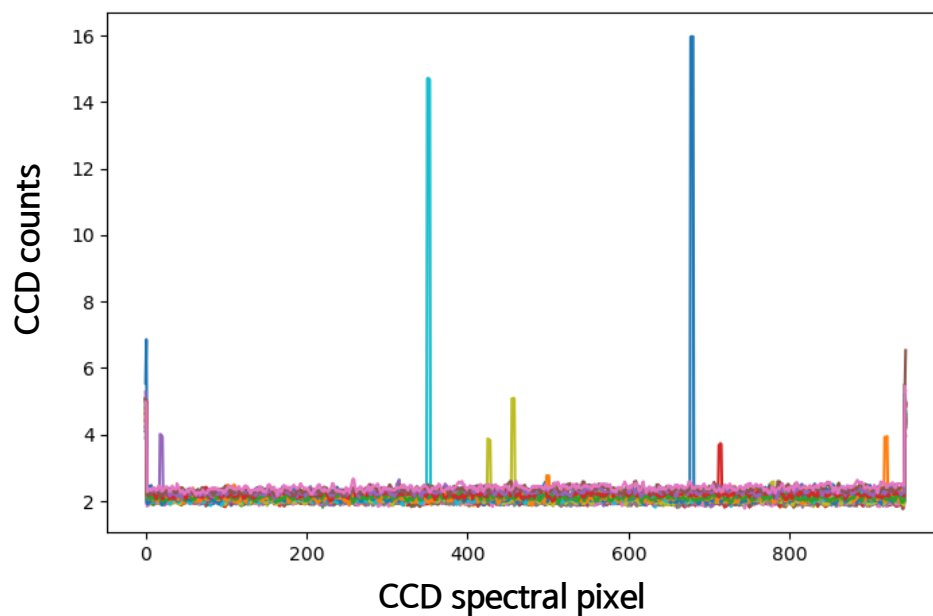

26

27 **Figure S3.** Random noise level per pre-binned spatial pixels (binning 50 raw spatial CCD columns; shown in  
 28 different colors) under integrated exposure time of 1 second.

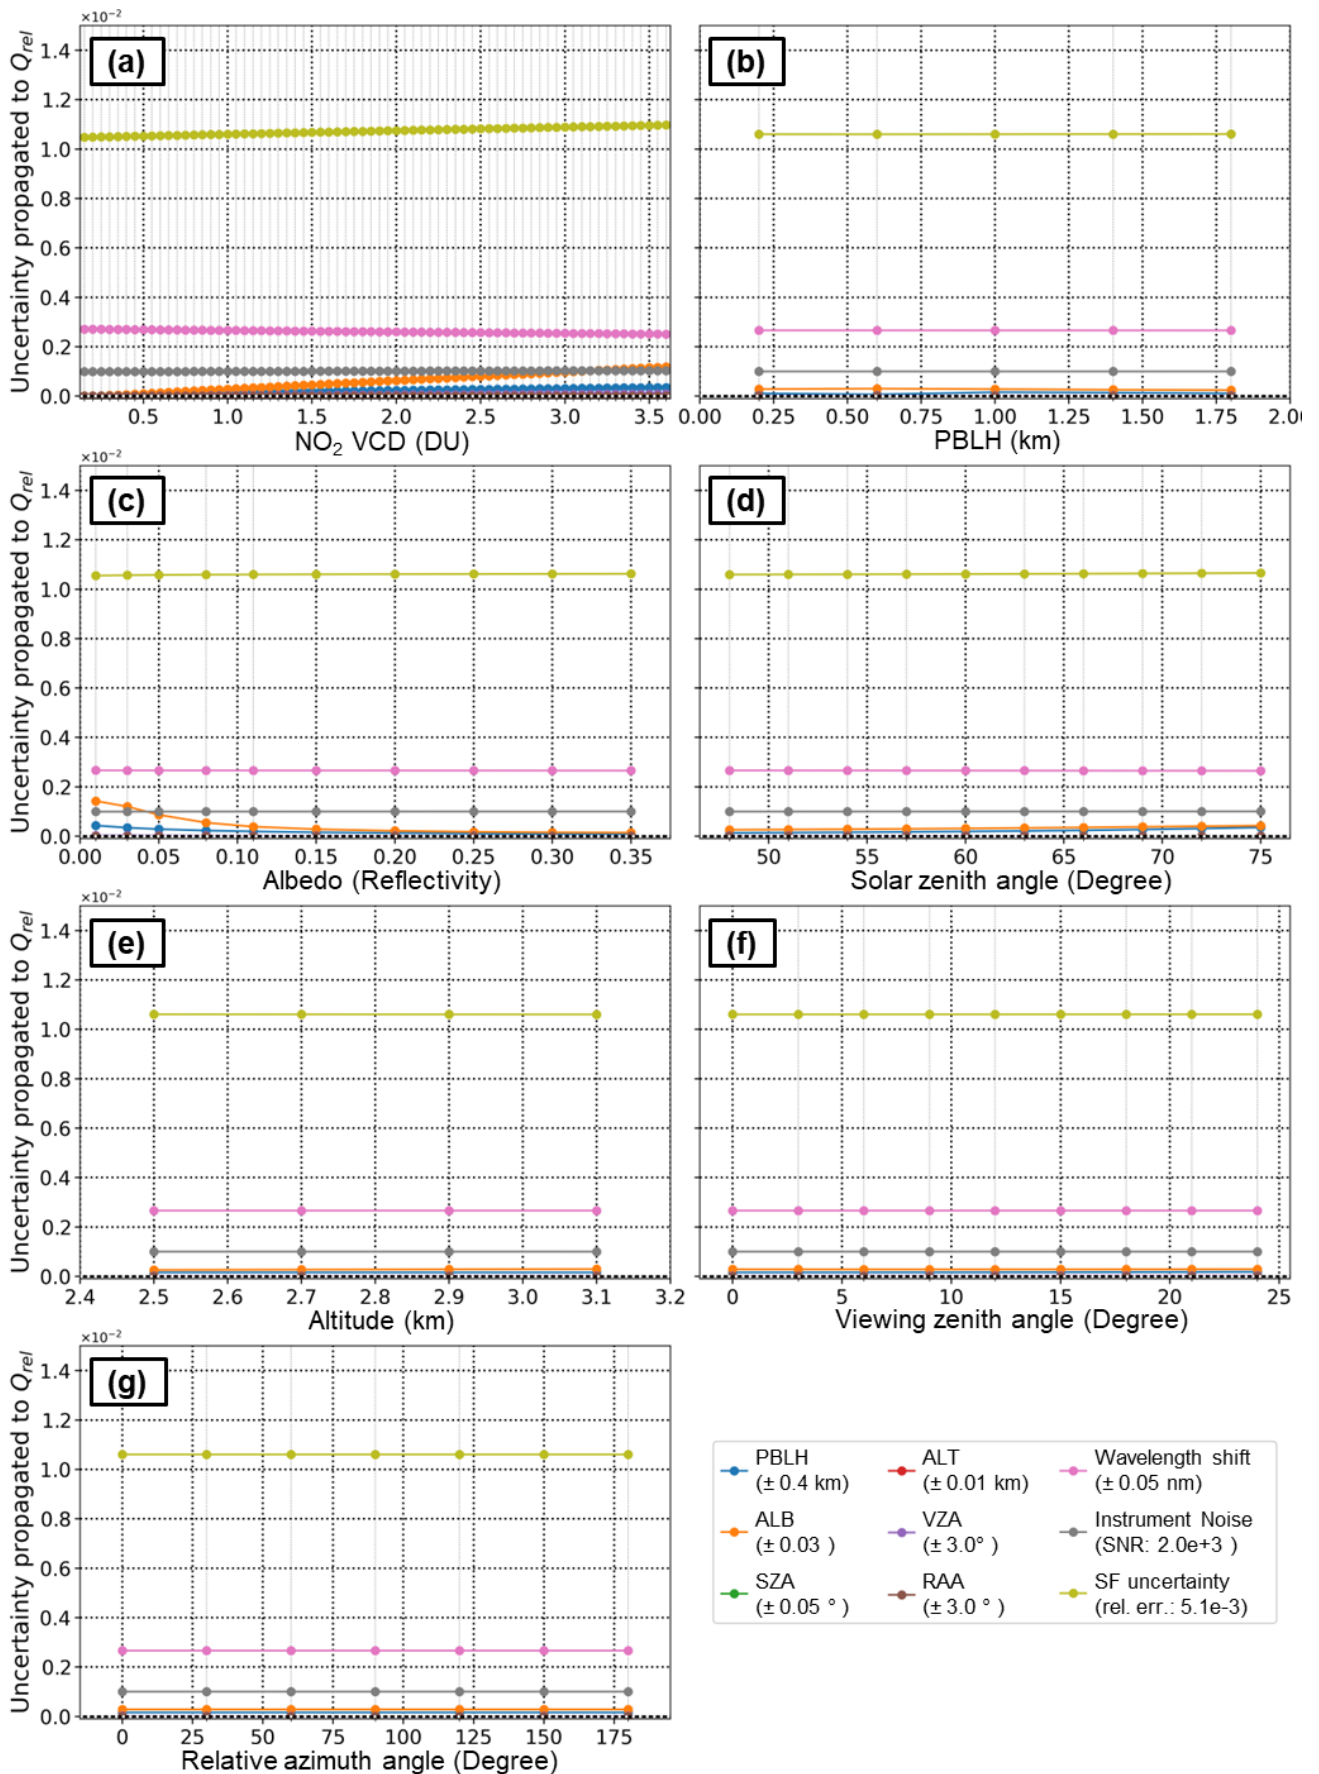

**Figure S4.** Sensitivity of Q-value calculated from simulated radiances at wavelength-pair 2 (i.e., Type\_A: 435.689, 437.015 nm; Type\_B: 433.037, 434.363 nm) depending on (a) NO<sub>2</sub> VCD, (b) PBLH, (c) albedo (ALB; reflectivity), (d) solar zenith angle (SZA), (e) observation altitude (ALT), (f) viewing zenith angle (VZA), and (g) relative azimuth angle (RAA) considering atmospheric condition at Pohang and its corresponding reference conditions (shown in supplementary Table S2).

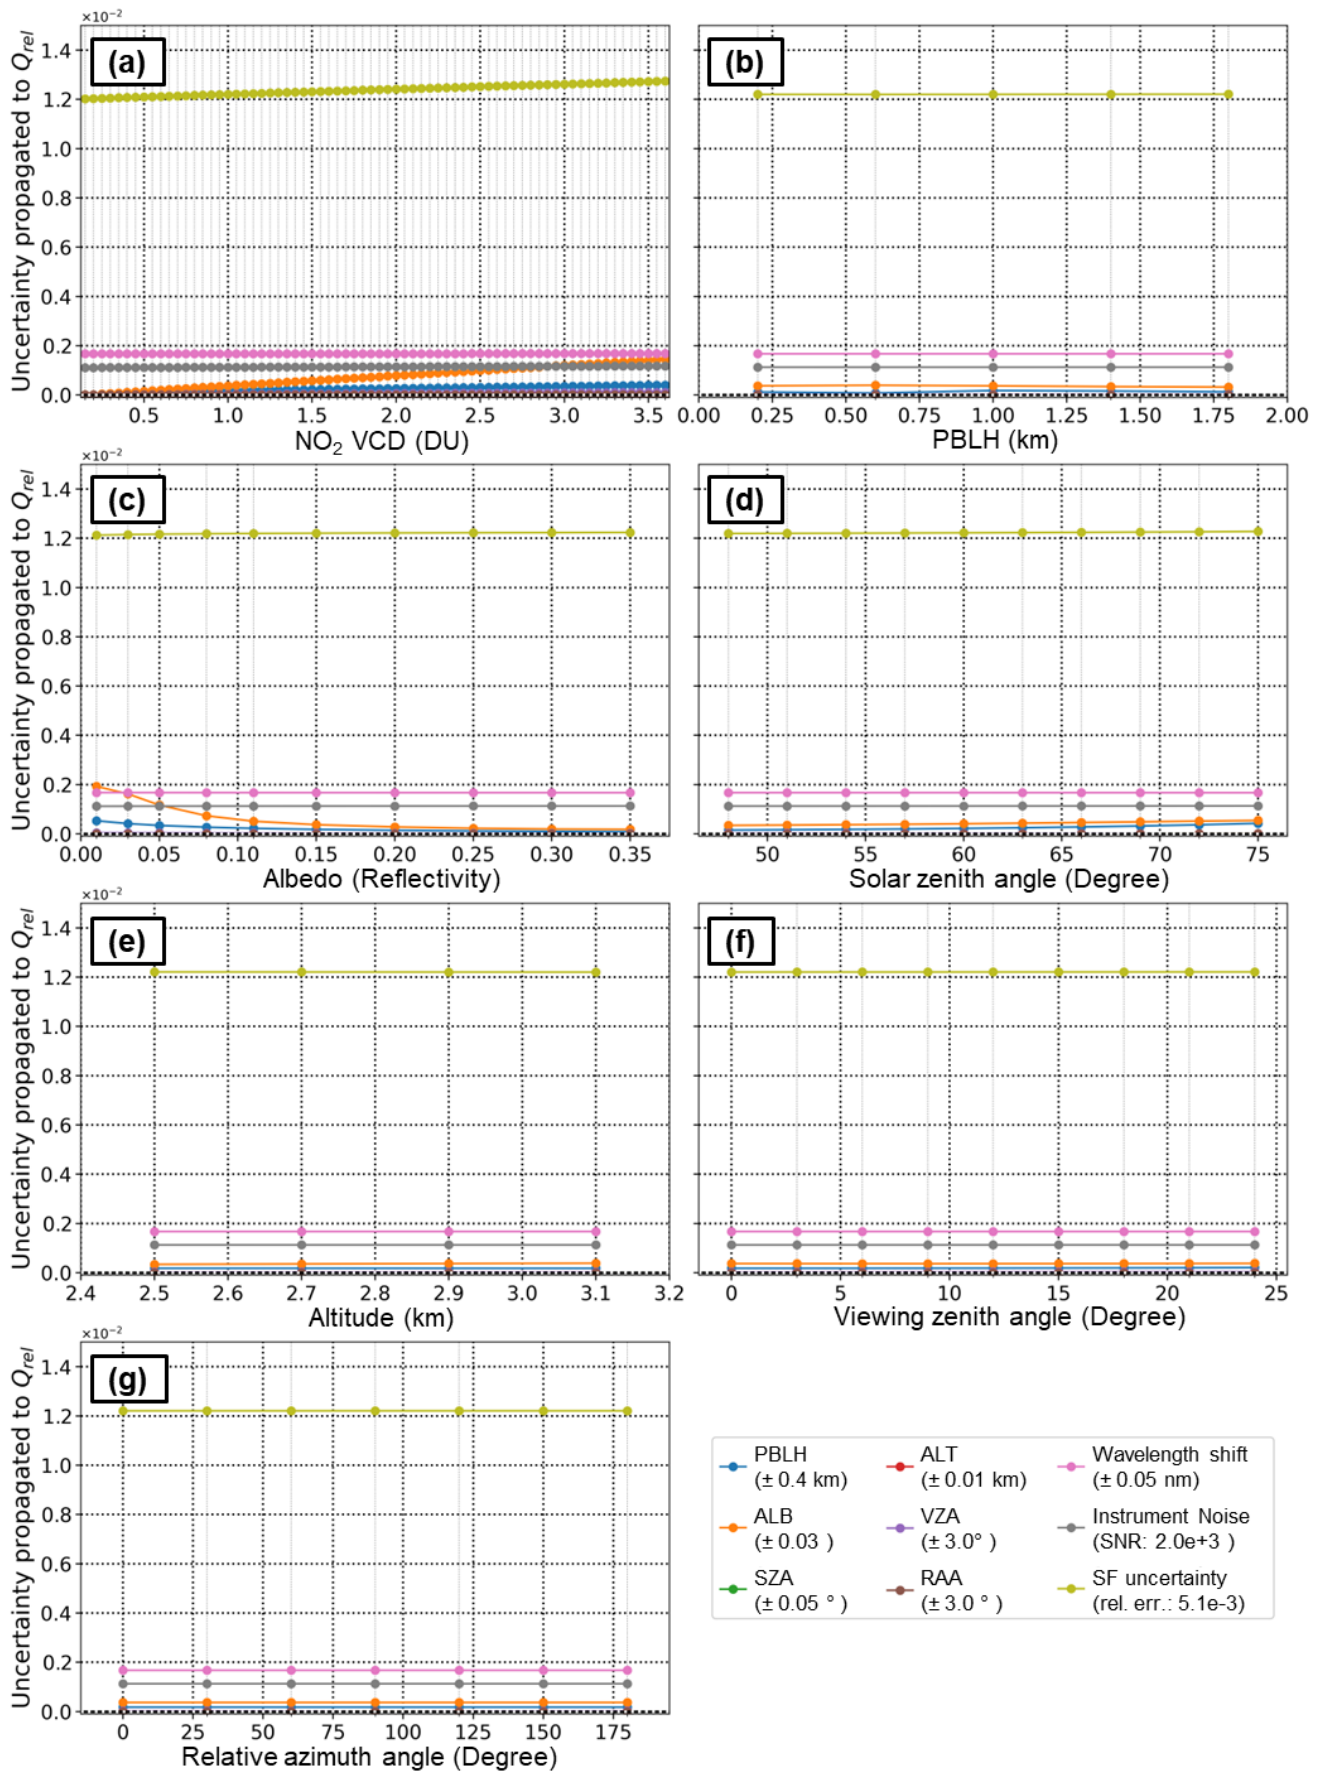

**Figure S5.** Sensitivity of Q-value calculated from simulated radiances at wavelength-pair 3 (i.e., Type\_A: 439.932, 441.258 nm; Type\_B: 442.849, 444.175 nm) depending on (a) NO<sub>2</sub> VCD, (b) PBLH, (c) albedo (ALB; reflectivity), (d) solar zenith angle (SZA), (e) observation altitude (ALT), (f) viewing zenith angle (VZA), and (g) relative azimuth angle (RAA) considering atmospheric condition at Pohang and its corresponding reference conditions (shown in supplementary Table S2).

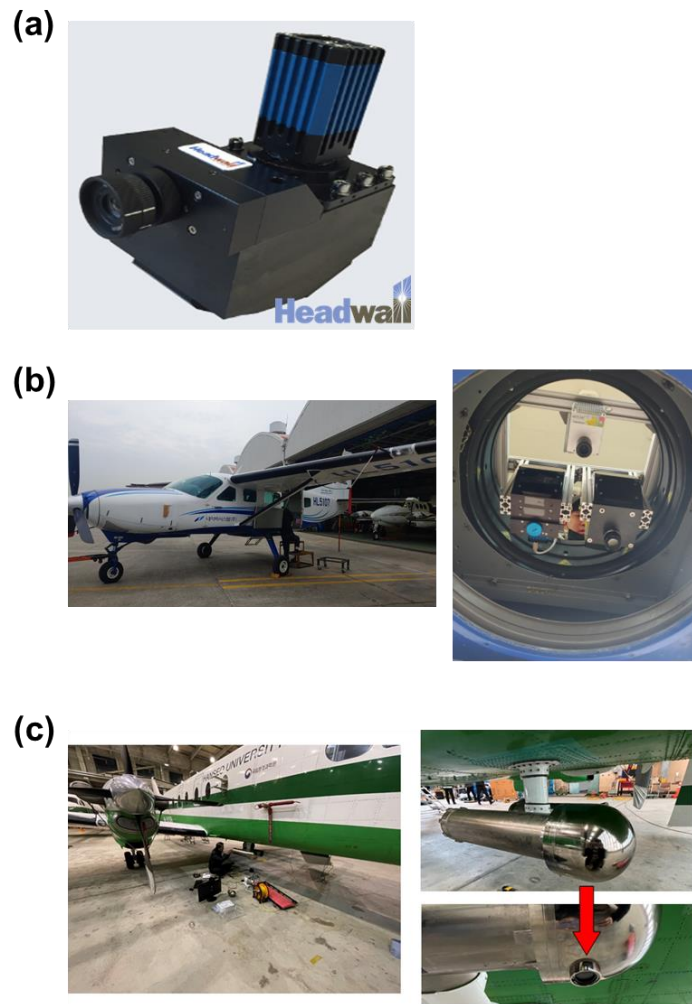

**Figure S6.** (a) The hyperspectral imaging sensor (HIS), manufactured by Headwall Photonics, Inc., used in this study. (b) Cessna 208 Caravan aircraft (left) and the HIS mounted configure on the camera hole of Cessna plane (right), and (c) Beechcraft 1900D (right) and the HIS mounted on an external canister on a pylon beneath an aircraft (left).

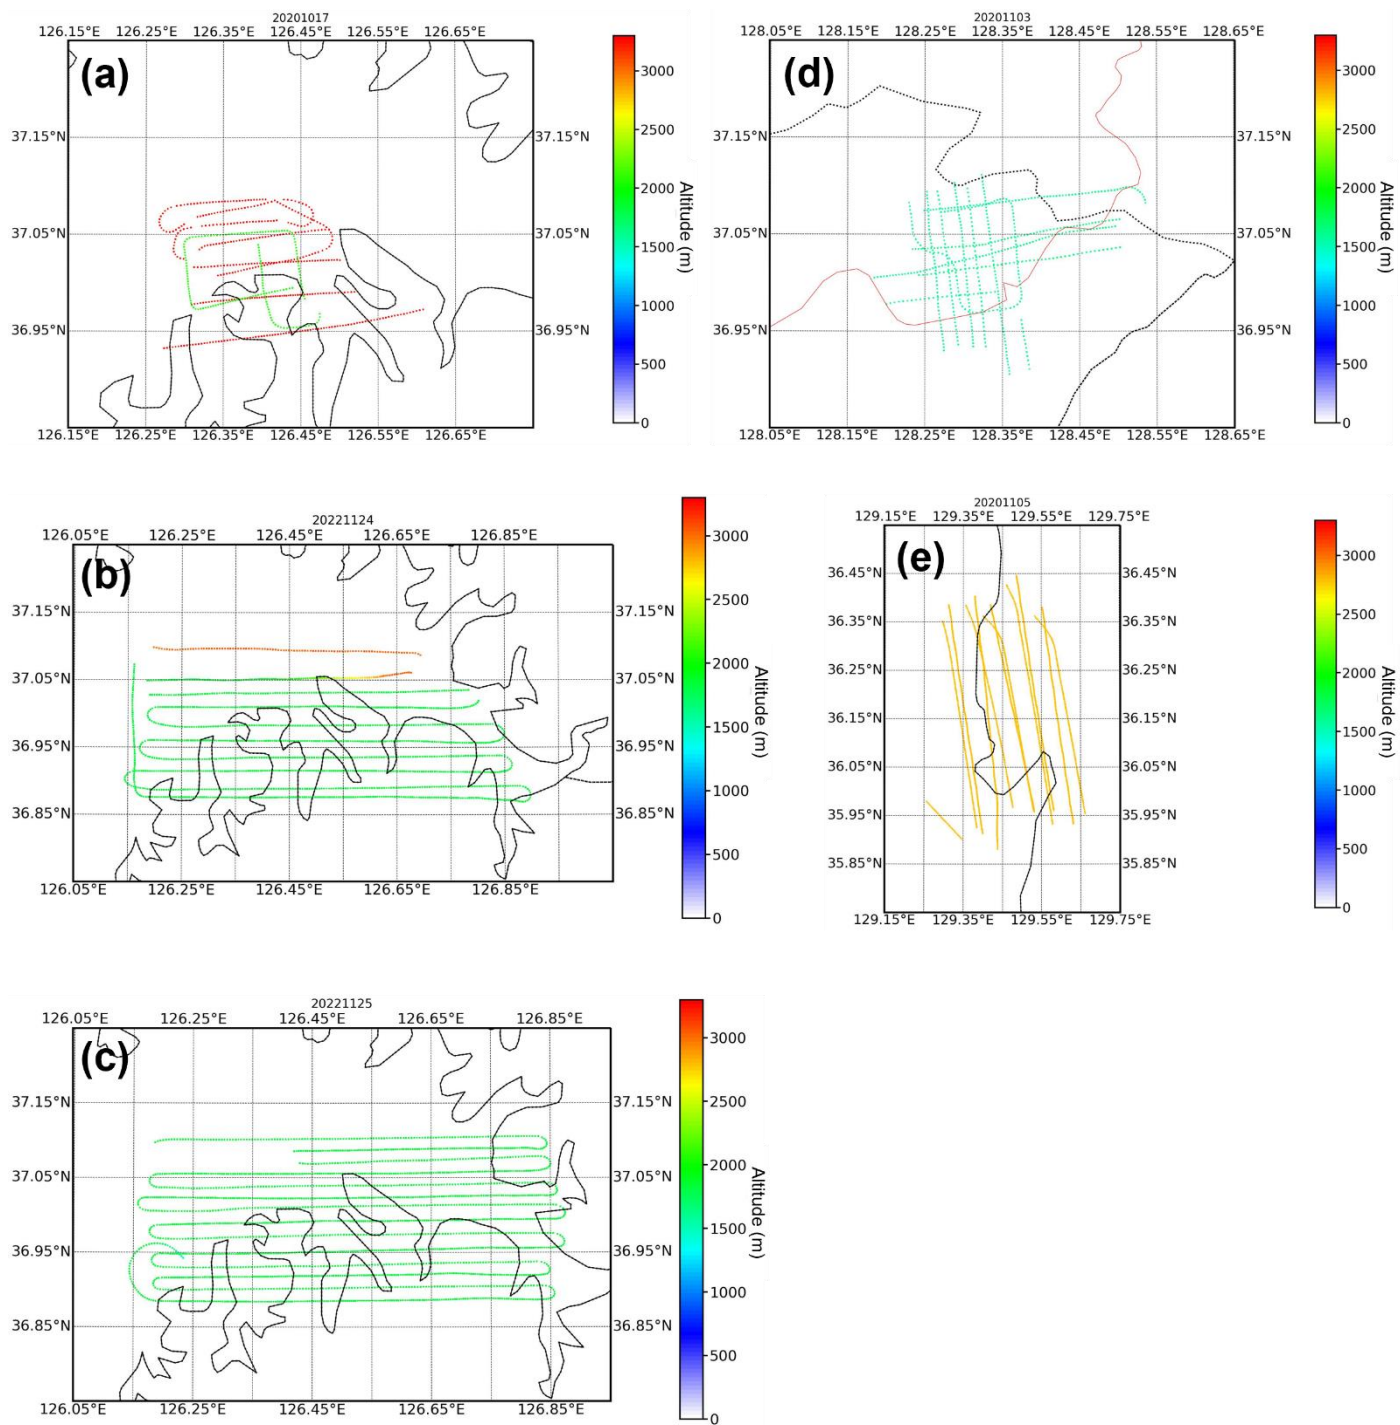

**Figure S7.** Routes and altitudes of research flights at Chungnam (a-c), Jecheon (d), and Pohang (e) area. Flight dates are shown at the top of each figure.

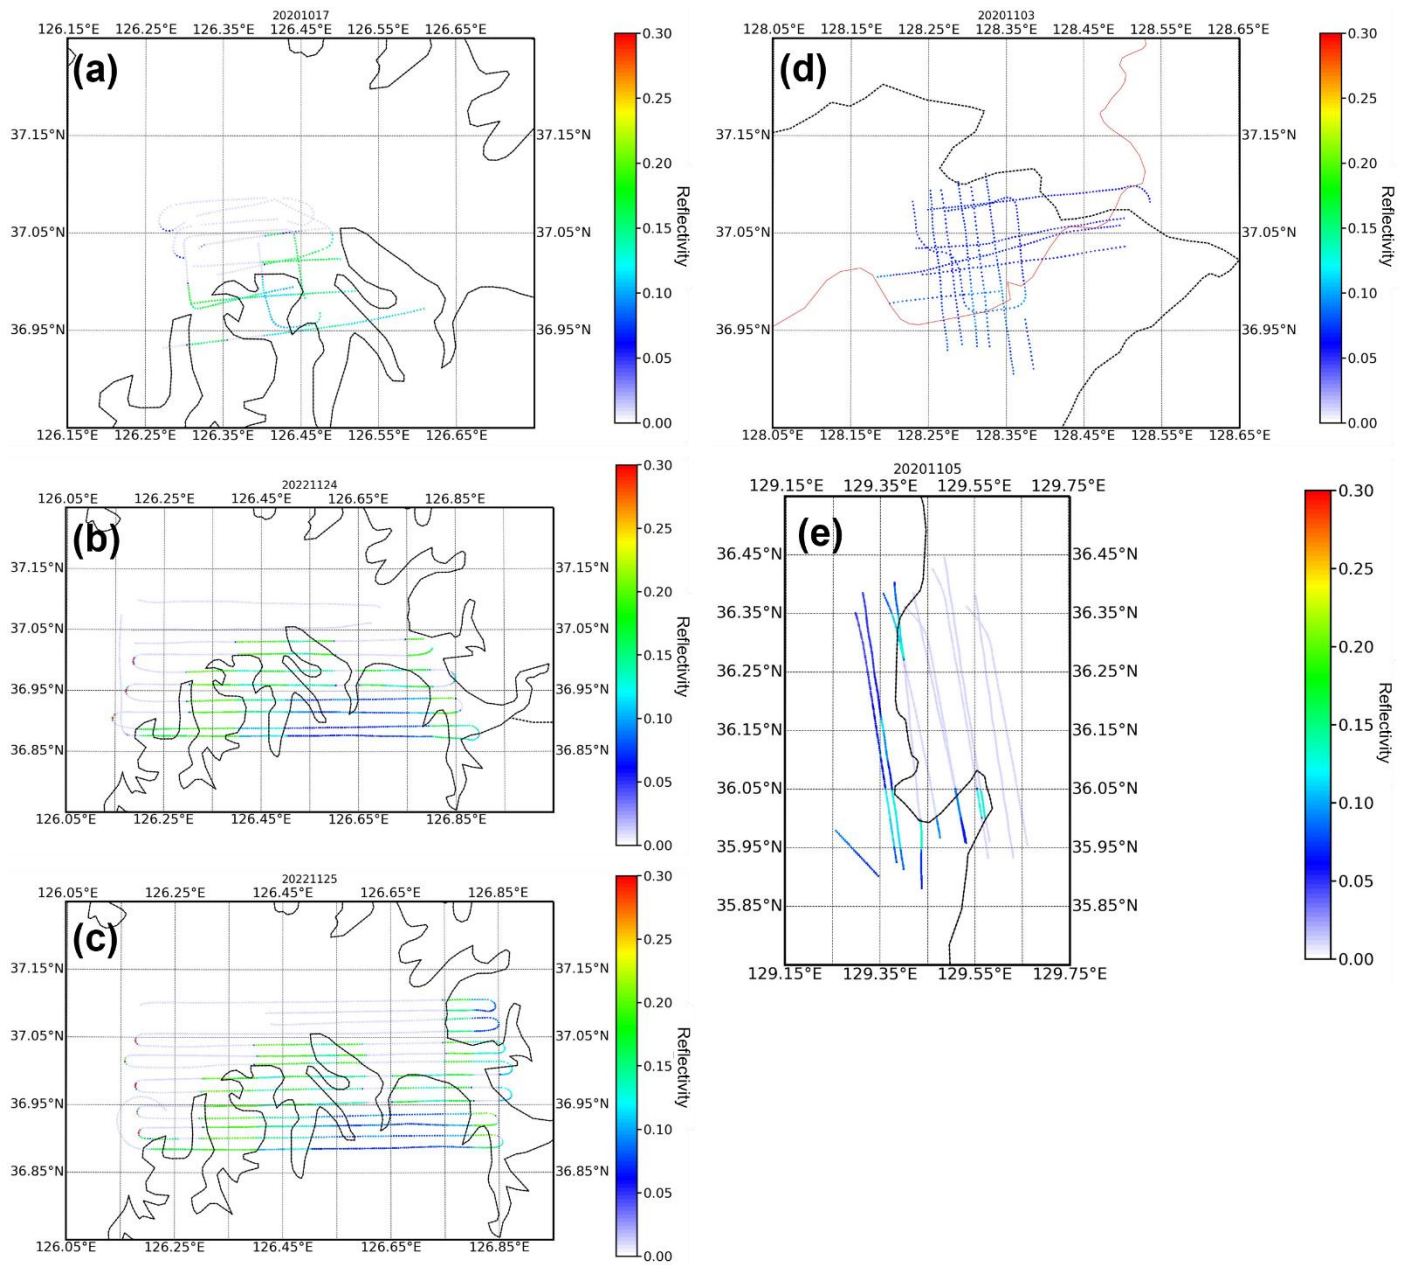

**Figure S8.** Effective Albedo calculated from VIIRS BRDF kernel and the HIS observation geometry along the research flight track conducted at Chungnam (a-c), Jaechon (d), and Pohang (e) area. Flight dates are shown at the top of each figure.

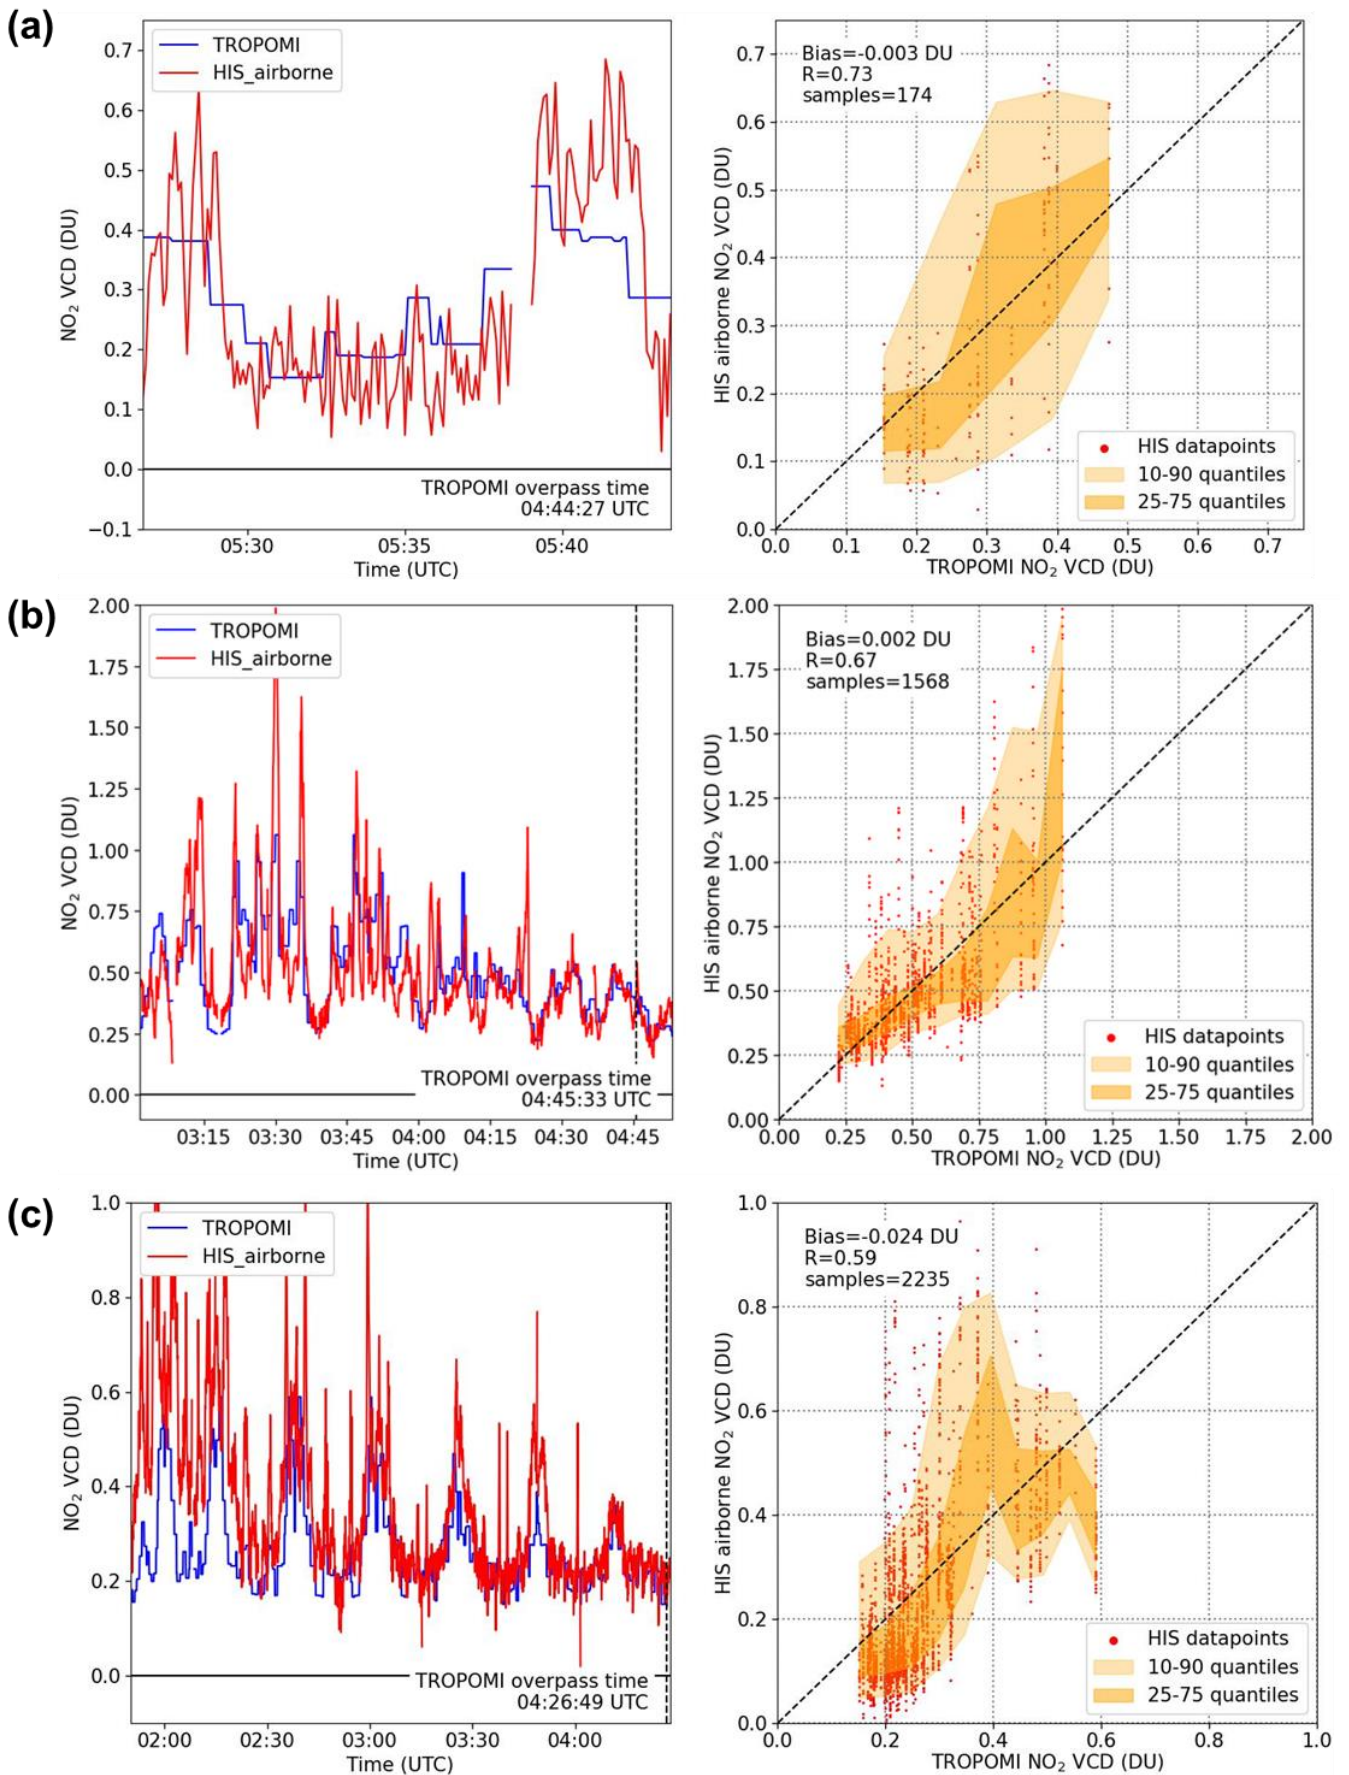

**Figure S9.** Time series of NO<sub>2</sub> VCD measured from HIS (red line) and TROPOMI (blue line) with TROPOMI overpass time shown in vertical dashed line (left) and the scatter plot comparing the HIS and TROPOMI NO<sub>2</sub> VCDs with the corresponding HIS NO<sub>2</sub> VCD quantiles (10, 25, 75, 90<sup>th</sup>) shown over the TROPOMI NO<sub>2</sub> VCD range (right) for the research flight at (a) 17 October 2020, (b) 24 November 2022, and (c) 25 November 2022 over the Chungnam domain.

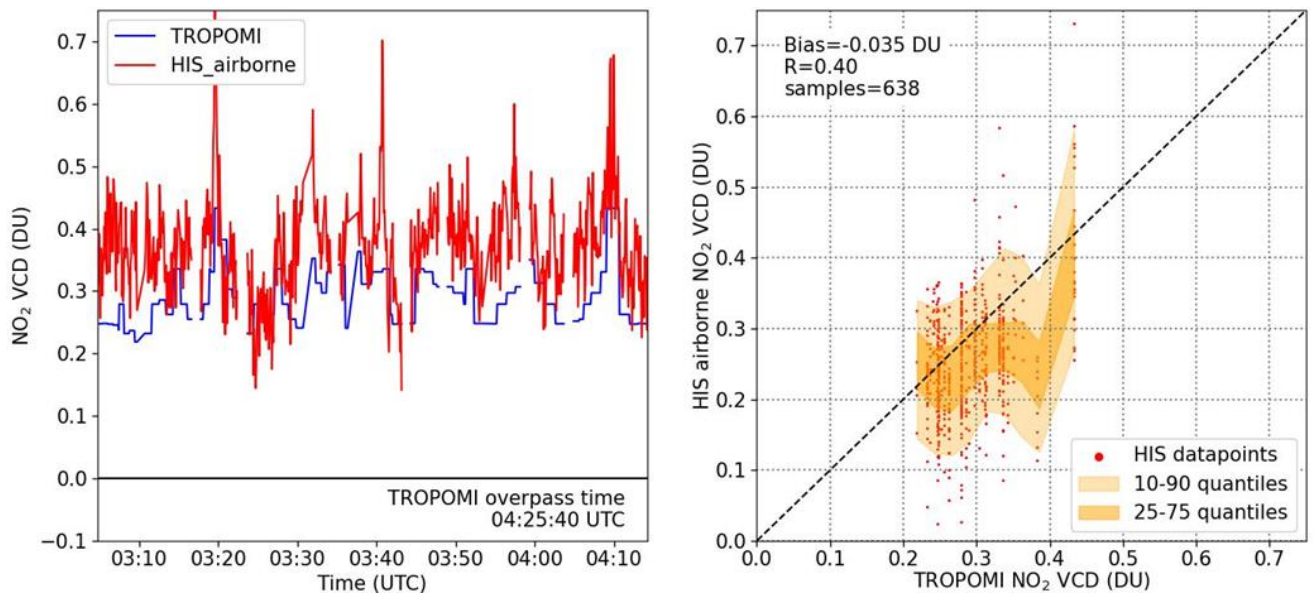

**Figure S10.** Time series of NO<sub>2</sub> VCD measured from HIS (red line) and TROPOMI (blue line) with TROPOMI overpass time denoted (left) and the scatter plot comparing the HIS and TROPOMI NO<sub>2</sub> VCDs with the corresponding HIS NO<sub>2</sub> VCD quantiles (10, 25, 75, 90<sup>th</sup>) shown over the TROPOMI NO<sub>2</sub> VCD range (right) for the research flight on 3 November 2020 over the Jaechon domain.

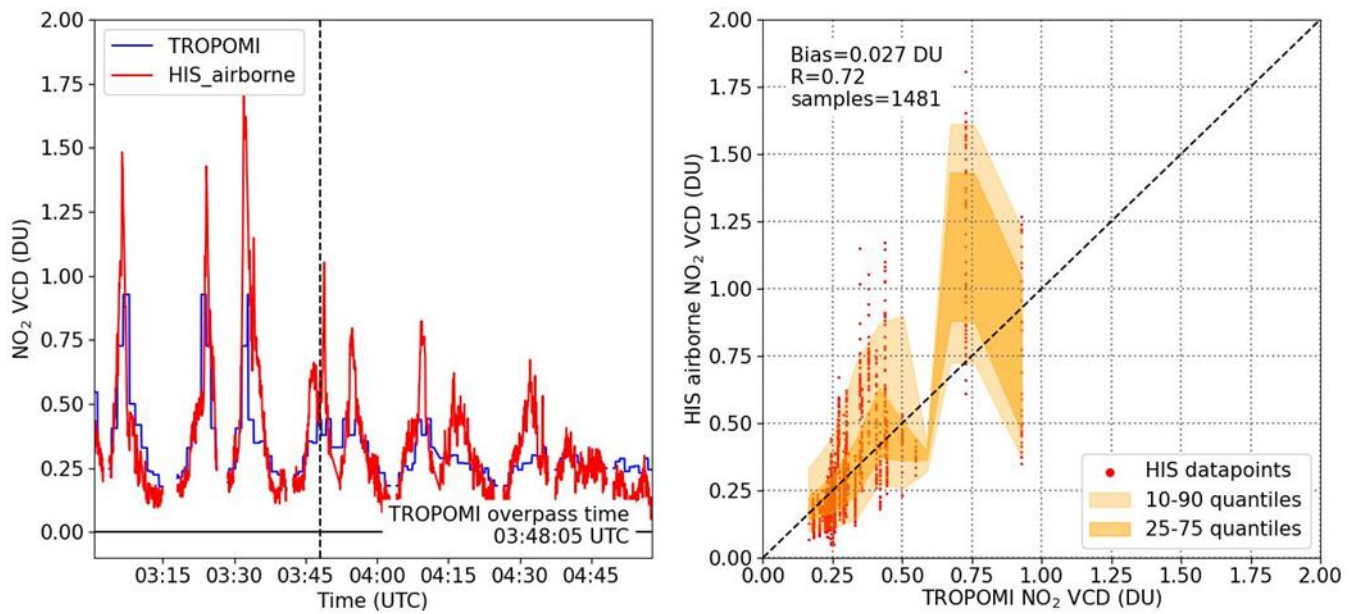

**Figure S11.** Time series of NO<sub>2</sub> VCD measured from HIS (red line) and TROPOMI (blue line) with TROPOMI overpass time denoted (left) and the scatter plot comparing the HIS and TROPOMI NO<sub>2</sub> VCDs with the corresponding HIS NO<sub>2</sub> VCD quantiles (10, 25, 75, 90<sup>th</sup>) shown over the TROPOMI NO<sub>2</sub> VCD range (right) for the research flight on 5 November 2020 over the Pohang domain.
